# Supplementary material for: Acidity constants of some sulfur oxoacids in aqueous solution using CCSD and MP2 methods
Source: Royal Society of Chemistry journal article supplement (doi:10.1039/c3dt33056g), 2013-01-01
Supplement: c3dt33056g.pdf [file c3dt33056g.pdf]

## Supporting Information

**Table S1.**

| Species                                      | GA (MP2/6-311++G(3df,3pd)) | GA (CCSD/6-311++G(d,p)) |
|----------------------------------------------|----------------------------|-------------------------|
| H <sub>2</sub> SO                            | 346.5022                   | 350.6437                |
| H <sub>2</sub> SO <sub>2</sub>               | 327.8653                   | 350.3300                |
| H <sub>2</sub> SO <sub>3</sub>               | 311.9895                   | 331.9441                |
| H <sub>2</sub> SO <sub>4</sub>               | 303.2045                   | 306.6557                |
| H <sub>2</sub> SO <sub>5</sub>               | 295.1724                   | 300.1366                |
| H <sub>2</sub> S <sub>2</sub> O              | 329.8733                   | 337.0268                |
| H <sub>2</sub> S <sub>2</sub> O <sub>3</sub> | 298.4982                   | 304.7462                |
| H <sub>2</sub> S <sub>2</sub> O <sub>4</sub> | 305.0869                   | 308.3500                |
| H <sub>2</sub> S <sub>2</sub> O <sub>6</sub> | 282.2459                   | 278.9828                |
| H <sub>2</sub> S <sub>2</sub> O <sub>7</sub> | 279.9868                   | 280.1123                |

**Table S2.**

| Species                                      | Total Energy |            |            | Free Energy |            |            |
|----------------------------------------------|--------------|------------|------------|-------------|------------|------------|
|                                              | Neutral      | Monoanion  | Dianion    | Neutral     | Monoanion  | Dianion    |
| H <sub>2</sub> SO                            | -473.9925    | -473.4209  | -472.6219  | -473.9936   | -473.4314  | -472.6417  |
| H <sub>2</sub> SO <sub>2</sub>               | -549.1145    | -548.5675  | -547.7710  | -549.1106   | -548.5781  | -547.7916  |
| H <sub>2</sub> SO <sub>3</sub>               | -624.2623    | -623.7474  | -622.9855  | -624.2582   | -623.7510  | -623.0021  |
| H <sub>2</sub> SO <sub>4</sub>               | -699.4014    | -698.8952  | -698.1698  | -699.3902   | -698.8970  | -698.1828  |
| H <sub>2</sub> SO <sub>5</sub>               | -774.4134    | -773.9216  | -773.1755  | -774.4012   | -773.9208  | -773.1875  |
| H <sub>2</sub> S <sub>2</sub> O              | -871.7156    | -871.1698  | -870.3892  | -871.7181   | -871.1824  | -870.4122  |
| H <sub>2</sub> S <sub>2</sub> O <sub>3</sub> | -1021.9719   | -1021.4744 | -1020.7723 | -1021.9676  | -1021.4819 | -1020.7874 |
| H <sub>2</sub> S <sub>2</sub> O <sub>4</sub> | -1097.0858   | -1096.5800 | -1095.8687 | -1097.0792  | -1096.5830 | -1095.8867 |
| H <sub>2</sub> S <sub>2</sub> O <sub>6</sub> | -1247.3267   | -1246.8546 | -1246.1999 | -1247.3107  | -1246.8509 | -1246.2064 |
| H <sub>2</sub> S <sub>2</sub> O <sub>7</sub> | -1322.4761   | -1322.0070 | -1321.3516 | -1322.4547  | -1321.9985 | -1321.3546 |

**Table S3.**

| Species                                      | Total Energy |            |            | Free Energy |            |            |
|----------------------------------------------|--------------|------------|------------|-------------|------------|------------|
|                                              | Neutral      | Monoanion  | Dianion    | Neutral     | Monoanion  | Dianion    |
| H <sub>2</sub> SO                            | -473.9117    | -473.3333  | -472.5169  | -473.9126   | -473.3438  | -472.5366  |
| H <sub>2</sub> SO <sub>2</sub>               | -548.9784    | -548.3954  | -547.6041  | -548.9741   | -548.4058  | -547.6246  |
| H <sub>2</sub> SO <sub>3</sub>               | -624.0467    | -623.4988  | -622.7473  | -624.0412   | -623.5022  | -622.7636  |
| H <sub>2</sub> SO <sub>4</sub>               | -699.1052    | -698.5935  | -697.8644  | -699.0933   | -698.5946  | -697.8772  |
| H <sub>2</sub> SO <sub>5</sub>               | -774.0762    | -773.5762  | -772.8336  | -774.0634   | -773.5751  | -772.8458  |
| H <sub>2</sub> S <sub>2</sub> O              | -871.5900    | -871.0330  | -870.2518  | -871.5921   | -871.0450  | -870.2746  |
| H <sub>2</sub> S <sub>2</sub> O <sub>3</sub> | -1021.6927   | -1021.1848 | -1020.4807 | -1021.6879  | -1021.1923 | -1020.4956 |
| H <sub>2</sub> S <sub>2</sub> O <sub>4</sub> | -1096.7503   | -1096.2388 | -1095.5161 | -1096.7428  | -1096.2414 | -1095.5342 |
| H <sub>2</sub> S <sub>2</sub> O <sub>6</sub> | -1246.8368   | -1246.3708 | -1245.7007 | -1246.8201  | -1246.3655 | -1245.7072 |
| H <sub>2</sub> S <sub>2</sub> O <sub>7</sub> | -1321.9176   | -1321.4596 | -1320.7762 | -1321.8967  | -1321.4403 | -1320.7779 |

**Table S4.**

| Species                                      | $\Delta G_{\text{sol.}}$ |           |         |
|----------------------------------------------|--------------------------|-----------|---------|
|                                              | Neutral                  | Monoanion | Dianion |
| H <sub>2</sub> SO                            | -4.40                    | -64.52    | -241.48 |
| H <sub>2</sub> SO <sub>2</sub>               | -7.46                    | -65.13    | -240.58 |
| H <sub>2</sub> SO <sub>3</sub>               | -9.46                    | -62.68    | -235.56 |
| H <sub>2</sub> SO <sub>4</sub>               | -12.10                   | -64.91    | -231.53 |
| H <sub>2</sub> SO <sub>5</sub>               | -11.02                   | -62.54    | -226.33 |
| H <sub>2</sub> S <sub>2</sub> O              | -4.70                    | -57.68    | -203.28 |
| H <sub>2</sub> S <sub>2</sub> O <sub>3</sub> | -7.77                    | -57.01    | -209.81 |
| H <sub>2</sub> S <sub>2</sub> O <sub>4</sub> | -3.79                    | -60.52    | -202.14 |
| H <sub>2</sub> S <sub>2</sub> O <sub>6</sub> | -12.15                   | -55.77    | -197.67 |
| H <sub>2</sub> S <sub>2</sub> O <sub>7</sub> | -11.69                   | -50.85    | -192.46 |

**Table S5.**

| Species                                      | $\Delta G_{\text{sol.}}$ |           |         |
|----------------------------------------------|--------------------------|-----------|---------|
|                                              | Neutral                  | Monoanion | Dianion |
| H <sub>2</sub> SO                            | -5.09                    | -64.88    | -243.38 |
| H <sub>2</sub> SO <sub>2</sub>               | -8.45                    | -70.19    | -246.32 |
| H <sub>2</sub> SO <sub>3</sub>               | -11.57                   | -65.59    | -241.44 |
| H <sub>2</sub> SO <sub>4</sub>               | -14.07                   | -67.16    | -234.38 |
| H <sub>2</sub> SO <sub>5</sub>               | -12.94                   | -64.71    | -227.15 |
| H <sub>2</sub> S <sub>2</sub> O              | -5.30                    | -58.06    | -203.71 |
| H <sub>2</sub> S <sub>2</sub> O <sub>3</sub> | -9.94                    | -60.43    | -212.27 |
| H <sub>2</sub> S <sub>2</sub> O <sub>4</sub> | -7.28                    | -63.79    | -208.65 |
| H <sub>2</sub> S <sub>2</sub> O <sub>6</sub> | -14.62                   | -57.90    | -199.95 |
| H <sub>2</sub> S <sub>2</sub> O <sub>7</sub> | -13.62                   | -52.83    | -195.27 |

## Molecular Cartesian Coordinates

B3LYP/6-311++G(d,p) Gas and Aqueous Phases

### H<sub>2</sub>SO (Gas Phase)

|   |           |           |           |
|---|-----------|-----------|-----------|
| S | 0.589182  | -0.090312 | 0.006843  |
| H | 0.867145  | 1.236078  | 0.047958  |
| O | -1.103734 | 0.029614  | -0.116734 |
| H | -1.464184 | -0.027995 | 0.776433  |

### H<sub>2</sub>SO<sub>2</sub> (Gas Phase)

|   |           |           |           |
|---|-----------|-----------|-----------|
| S | 0.000000  | 0.000000  | 0.567082  |
| O | 0.000000  | 1.313899  | -0.472841 |
| O | 0.000000  | -1.313899 | -0.472841 |
| H | 0.908641  | 1.490424  | -0.753928 |
| H | -0.908641 | -1.490424 | -0.753928 |

### H<sub>2</sub>SO<sub>3</sub> (Gas Phase)

|   |           |           |           |
|---|-----------|-----------|-----------|
| S | 0.296309  | 0.345267  | 0.000000  |
| O | 0.296309  | -0.718162 | 1.280815  |
| O | 0.296309  | -0.718162 | -1.280815 |
| H | -0.617950 | -0.961756 | 1.504598  |
| H | -0.617950 | -0.961756 | -1.504598 |
| O | -1.030748 | 0.986229  | 0.000000  |

### H<sub>2</sub>SO<sub>4</sub> (Gas Phase)

|   |           |           |           |
|---|-----------|-----------|-----------|
| S | 0.000000  | 0.000000  | 0.169103  |
| O | 0.000000  | 1.259716  | -0.859347 |
| O | 0.000000  | -1.259716 | -0.859347 |
| H | 0.901927  | 1.413628  | -1.181762 |
| H | -0.901927 | -1.413628 | -1.181762 |
| O | 1.273099  | -0.056150 | 0.837964  |
| O | -1.273099 | 0.056150  | 0.837964  |

### **H<sub>2</sub>SO<sub>5</sub> (Gas Phase)**

|   |           |           |           |
|---|-----------|-----------|-----------|
| S | 0.463972  | -0.128367 | 0.064095  |
| O | 0.268817  | -0.668960 | 1.380268  |
| O | 1.454550  | -0.587056 | -0.876010 |
| O | 0.577051  | 1.470174  | 0.254247  |
| O | -0.952172 | -0.279996 | -0.815980 |
| O | -2.083983 | 0.169308  | -0.044727 |
| H | 0.832595  | 1.883289  | -0.586449 |
| H | -2.370251 | -0.657181 | 0.378553  |

### **H<sub>2</sub>S<sub>2</sub>O (Gas Phase)**

|   |           |           |           |
|---|-----------|-----------|-----------|
| S | 0.542243  | 0.629804  | 0.001570  |
| S | -1.362645 | -0.205646 | -0.086920 |
| O | 1.613706  | -0.677762 | 0.113456  |
| H | 1.803101  | -0.992033 | -0.780926 |
| H | -1.586322 | -0.372392 | 1.238881  |

### **H<sub>2</sub>S<sub>2</sub>O<sub>3</sub> (Gas Phase)**

|   |           |           |           |
|---|-----------|-----------|-----------|
| S | -0.437507 | 0.055805  | -0.145956 |
| O | -0.837639 | 1.431807  | -0.312762 |
| O | -0.949086 | -0.336654 | 1.358511  |
| O | -0.825271 | -1.007852 | -1.051102 |
| S | 1.689716  | -0.080285 | 0.005284  |
| H | 1.772824  | 0.992891  | 0.821966  |
| H | -0.912213 | -1.299624 | 1.471615  |

### **H<sub>2</sub>S<sub>2</sub>O<sub>4</sub> (Gas Phase)**

|   |           |           |           |
|---|-----------|-----------|-----------|
| S | 0.531242  | 1.165200  | 0.459734  |
| S | -0.531242 | -1.165200 | 0.459734  |
| O | -0.531242 | 1.683631  | -0.476830 |
| O | 1.751832  | 0.516796  | -0.358901 |
| O | -1.751832 | -0.516796 | -0.358901 |
| O | 0.531242  | -1.683631 | -0.476830 |
| H | -1.510150 | 0.425955  | -0.669900 |
| H | 1.510150  | -0.425955 | -0.669900 |

### **H<sub>2</sub>S<sub>2</sub>O<sub>6</sub> (Gas Phase)**

|   |           |           |           |
|---|-----------|-----------|-----------|
| S | -0.187774 | 1.116474  | 0.124370  |
| O | 1.072847  | 1.761770  | -0.163610 |
| O | -1.072847 | 1.245574  | -1.231434 |
| O | -1.006555 | 1.413291  | 1.280735  |
| H | -1.984275 | 0.944773  | -1.075449 |
| S | 0.187774  | -1.116474 | 0.124370  |
| O | -1.072847 | -1.761770 | -0.163610 |
| O | 1.072847  | -1.245574 | -1.231434 |
| O | 1.006555  | -1.413291 | 1.280735  |
| H | 1.984275  | -0.944773 | -1.075449 |

### **H<sub>2</sub>S<sub>2</sub>O<sub>7</sub> (Gas Phase)**

|   |           |           |           |
|---|-----------|-----------|-----------|
| S | 0.000000  | 1.450103  | 0.069732  |
| O | 0.101960  | 2.480908  | 1.050217  |
| O | -1.484800 | 1.475872  | -0.511561 |
| O | 0.959805  | 1.265228  | -1.005234 |
| H | -1.635094 | 0.689269  | -1.076522 |
| S | 0.000000  | -1.450103 | 0.069732  |
| O | -0.101960 | -2.480908 | 1.050217  |
| O | 1.484800  | -1.475872 | -0.511561 |
| O | -0.959805 | -1.265228 | -1.005234 |
| H | 1.635094  | -0.689269 | -1.076522 |
| O | 0.000000  | 0.000000  | 0.923360  |

### **HSO<sup>-</sup> (Gas Phase)**

|   |           |           |          |
|---|-----------|-----------|----------|
| S | 0.037547  | -0.663782 | 0.000000 |
| O | 0.037547  | 1.157686  | 0.000000 |
| H | -0.901130 | 1.359019  | 0.000000 |

### **HSO<sub>2</sub><sup>-</sup> (Gas Phase)**

|   |           |           |           |
|---|-----------|-----------|-----------|
| S | 0.000092  | 0.367016  | -0.132215 |
| O | 1.286562  | -0.439693 | 0.065649  |
| O | -1.286729 | -0.439599 | 0.065608  |
| H | -0.000133 | 1.162075  | 1.065381  |

### **HSO<sub>3</sub><sup>-</sup> (Gas Phase)**

|   |           |           |           |
|---|-----------|-----------|-----------|
| S | 0.000000  | 0.000000  | 0.172821  |
| O | 0.000000  | 1.442425  | -0.180031 |
| O | -1.249177 | -0.721213 | -0.180031 |
| O | 1.249177  | -0.721213 | -0.180031 |
| H | 0.000000  | 0.000000  | 1.55560   |



### **HSO<sub>4</sub><sup>-</sup> (Gas Phase)**

|   |           |           |           |
|---|-----------|-----------|-----------|
| S | -0.155904 | -0.023194 | -0.008759 |
| O | 1.487716  | 0.452330  | 0.102587  |
| O | -0.415224 | -0.732323 | 1.262624  |
| H | 1.987603  | -0.372978 | 0.081835  |
| O | -0.827520 | 1.275480  | -0.157873 |
| O | -0.181614 | -0.902477 | -1.200051 |

### **HSO<sub>5</sub><sup>-</sup> (Gas Phase)**

|   |           |           |           |
|---|-----------|-----------|-----------|
| S | -0.502159 | -0.062792 | -0.016679 |
| O | -0.761625 | -0.818571 | 1.215901  |
| O | -1.440785 | 1.025535  | -0.314139 |
| O | -0.077218 | -0.897946 | -1.171159 |
| O | 0.946786  | 0.875219  | 0.252286  |
| O | 2.106145  | 0.005749  | 0.132306  |
| H | 1.848126  | -0.515210 | -0.654704 |

### **HS<sub>2</sub>O<sup>-</sup> (Gas Phase)**

|   |           |           |           |
|---|-----------|-----------|-----------|
| S | 0.461907  | 0.650897  | 0.020685  |
| S | -1.396630 | -0.254006 | -0.010121 |
| O | 1.677195  | -0.646377 | -0.106940 |
| H | 1.538022  | -1.179240 | 0.686493  |

### **HS<sub>2</sub>O<sub>3</sub><sup>-</sup> (Gas Phase)**

|   |           |           |           |
|---|-----------|-----------|-----------|
| S | 0.538510  | 0.002948  | -0.000042 |
| O | 0.862448  | 1.442425  | -0.003272 |
| O | 0.874529  | -0.726989 | -1.239618 |
| O | 0.875304  | -0.721359 | 1.242584  |
| S | -1.728684 | 0.079016  | 0.000139  |
| H | -1.855469 | -1.264054 | 0.000897  |

### **HS<sub>2</sub>O<sub>4</sub><sup>-</sup> (Gas Phase)**

|   |           |           |           |
|---|-----------|-----------|-----------|
| S | -0.788276 | 0.066294  | -0.002128 |
| S | 1.267699  | -0.811549 | 0.063679  |
| O | 2.111976  | 0.678616  | 0.067420  |
| O | -0.478346 | 1.285708  | -0.803442 |
| O | -1.227864 | 0.348616  | 1.377303  |
| O | -1.559431 | -0.979403 | -0.702683 |
| H | 1.558554  | 1.255784  | -0.493597 |

**HS<sub>2</sub>O<sub>6</sub><sup>-</sup> (Gas Phase)**

|   |           |           |           |
|---|-----------|-----------|-----------|
| S | -1.114792 | -0.168985 | 0.018432  |
| O | -1.734229 | -0.637469 | 1.259935  |
| O | -1.382542 | 1.481137  | -0.004021 |
| O | -1.598543 | -0.716876 | -1.254517 |
| H | -0.608120 | 1.857137  | -0.466189 |
| S | 1.234738  | -0.035526 | 0.014957  |
| O | 1.309604  | 1.219520  | -0.776081 |
| O | 1.581557  | 0.090381  | 1.434606  |
| O | 1.660276  | -1.259812 | -0.668427 |

**HS<sub>2</sub>O<sub>7</sub><sup>-</sup> (Gas Phase)**

|   |           |           |           |
|---|-----------|-----------|-----------|
| S | 1.574220  | 0.015127  | 0.009503  |
| O | 2.327434  | -0.553833 | 1.117168  |
| O | 1.879055  | 1.381229  | -0.387233 |
| O | 1.233384  | -0.918313 | -1.090763 |
| S | -1.478603 | 0.113630  | 0.080178  |
| O | -2.520472 | -0.048687 | 1.073926  |
| O | -1.389610 | -1.298951 | -0.713108 |
| O | -1.577194 | 1.192545  | -0.888278 |
| H | -0.479520 | -1.350674 | -1.099103 |
| O | -0.083889 | 0.157330  | 0.846314  |

**SO<sub>2</sub><sup>2-</sup> (Gas Phase)**

|   |          |          |           |
|---|----------|----------|-----------|
| S | 0.000000 | 0.000000 | 0.565111  |
| O | 0.000000 | 0.000000 | -1.130223 |

**SO<sub>2</sub><sup>2-</sup> (Gas Phase)**

|   |          |           |           |
|---|----------|-----------|-----------|
| S | 0.000000 | 0.000000  | 0.461717  |
| O | 0.000000 | 1.335948  | -0.461717 |
| O | 0.000000 | -1.335948 | -0.461717 |

**SO<sub>3</sub><sup>2-</sup> (Gas Phase)**

|   |           |           |           |
|---|-----------|-----------|-----------|
| S | 0.000000  | 0.000000  | 0.338982  |
| O | 0.000000  | 1.460817  | -0.225988 |
| O | -1.265105 | -0.730409 | -0.225988 |
| O | 1.265105  | -0.730409 | -0.225988 |

**SO<sub>4</sub><sup>2-</sup> (Gas Phase)**

|   |           |           |           |
|---|-----------|-----------|-----------|
| S | -0.000012 | -0.000013 | 0.000010  |
| O | 1.060225  | 0.174550  | 1.084622  |
| O | -1.287733 | -0.528370 | 0.627336  |
| O | 0.500972  | -0.992629 | -1.046248 |
| O | -0.273442 | 1.346474  | -0.665732 |

**SO<sub>5</sub><sup>2-</sup> (Gas Phase)**

|   |           |           |           |
|---|-----------|-----------|-----------|
| S | -0.401912 | 0.127274  | 0.000000  |
| O | -0.827704 | -0.589038 | 1.241466  |
| O | -0.827704 | 1.567725  | 0.000000  |
| O | -0.827704 | -0.589038 | -1.241466 |
| O | 1.241362  | 0.305479  | 0.000000  |
| O | 2.045574  | -0.949677 | 0.000000  |

**S<sub>2</sub>O<sup>2-</sup> (Gas Phase)**

|   |          |           |           |
|---|----------|-----------|-----------|
| S | 0.000000 | 1.551392  | -0.175060 |
| S | 0.000000 | -1.551392 | -0.175060 |
| O | 0.000000 | 0.000000  | 0.700240  |

**S<sub>2</sub>O<sub>3</sub><sup>2-</sup> (Gas Phase)**

|   |           |           |           |
|---|-----------|-----------|-----------|
| S | 0.000000  | 0.000000  | -0.416236 |
| O | 0.000000  | 1.435296  | -0.879786 |
| O | -1.243003 | -0.717648 | -0.879786 |
| O | 1.243003  | -0.717648 | -0.879786 |
| S | 0.000000  | 0.000000  | 1.735915  |

**S<sub>2</sub>O<sub>4</sub><sup>2-</sup> (Gas Phase)**

|   |           |           |           |
|---|-----------|-----------|-----------|
| S | 0.336115  | 1.255763  | 0.000000  |
| S | -0.336115 | -1.255763 | 0.000000  |
| O | -0.336115 | 1.806566  | 1.273307  |
| O | -0.336115 | 1.806566  | -1.273307 |
| O | 0.336115  | -1.806566 | -1.273307 |
| O | 0.336115  | -1.806566 | 1.273307  |

### **S<sub>2</sub>O<sub>6</sub><sup>2-</sup> (Gas Phase)**

|   |           |           |           |
|---|-----------|-----------|-----------|
| S | 0.000000  | 0.000000  | 1.163203  |
| O | 0.000000  | 1.440666  | 1.558569  |
| O | 1.247654  | -0.720333 | 1.558569  |
| O | -1.247654 | -0.720333 | 1.558569  |
| S | 0.000000  | 0.000000  | -1.163203 |
| O | 0.000000  | -1.440666 | -1.558569 |
| O | 1.247654  | 0.720333  | -1.558569 |
| O | -1.247654 | 0.720333  | -1.558569 |

### **S<sub>2</sub>O<sub>7</sub><sup>2-</sup> (Gas Phase)**

|   |           |           |           |
|---|-----------|-----------|-----------|
| S | 0.000000  | 1.560901  | -0.000647 |
| O | 0.000000  | 2.380871  | 1.234876  |
| O | 1.241734  | 1.672557  | -0.793628 |
| O | -1.241734 | 1.672557  | -0.793628 |
| S | 0.000000  | -1.560901 | -0.000647 |
| O | 0.000000  | -2.380871 | 1.234876  |
| O | -1.241734 | -1.672557 | -0.793628 |
| O | 1.241734  | -1.672557 | -0.793628 |
| O | 0.000000  | 0.000000  | 0.707351  |

### **H<sub>2</sub>SO (Aqueous Phase)**

|   |           |           |           |
|---|-----------|-----------|-----------|
| S | 0.591090  | -0.089081 | 0.011926  |
| H | 0.867242  | 1.238996  | -0.019240 |
| O | -1.106220 | 0.014492  | -0.118375 |
| H | -1.474921 | 0.070362  | 0.775424  |

### **H<sub>2</sub>SO<sub>2</sub> (Aqueous Phase)**

|   |           |           |           |
|---|-----------|-----------|-----------|
| S | 0.000000  | 0.000000  | 0.565296  |
| O | 0.000000  | 1.314775  | -0.473924 |
| O | 0.000000  | -1.314775 | -0.473924 |
| H | 0.911806  | 1.526577  | -0.730973 |
| H | -0.911806 | -1.526577 | -0.730973 |

### **H<sub>2</sub>SO<sub>3</sub> (Aqueous Phase)**

|   |           |           |           |
|---|-----------|-----------|-----------|
| S | 0.293115  | 0.344476  | 0.000000  |
| O | 0.293115  | -0.708785 | 1.272603  |
| O | 0.293115  | -0.708785 | -1.272603 |
| H | -0.574297 | -1.143157 | 1.390597  |
| H | -0.574297 | -1.143157 | -1.390597 |
| O | -1.028885 | 1.014408  | 0.000000  |

### H<sub>2</sub>SO<sub>4</sub> (Aqueous Phase)

|   |           |           |           |
|---|-----------|-----------|-----------|
| S | 0.000000  | 0.000000  | 0.150254  |
| O | 0.000000  | 1.259348  | -0.842548 |
| O | 0.000000  | -1.259348 | -0.842548 |
| H | 0.845217  | 1.346760  | -1.324275 |
| H | -0.845217 | -1.346760 | -1.324275 |
| O | 1.259076  | -0.086523 | 0.857829  |
| O | -1.259076 | 0.086523  | 0.857829  |

### H<sub>2</sub>SO<sub>5</sub> (Aqueous Phase)

|   |           |           |           |
|---|-----------|-----------|-----------|
| S | 0.460939  | -0.094517 | 0.082370  |
| O | 0.327164  | -0.267250 | 1.507720  |
| O | 1.435898  | -0.816762 | -0.703763 |
| O | 0.571445  | 1.477774  | -0.150367 |
| O | -0.957652 | -0.493269 | -0.685544 |
| O | -2.082797 | 0.149353  | -0.052990 |
| H | 0.746165  | 1.704149  | -1.085808 |
| H | -2.473655 | -0.590645 | 0.447445  |

### H<sub>2</sub>S<sub>2</sub>O (Aqueous Phase)

|   |           |           |           |
|---|-----------|-----------|-----------|
| S | 0.540272  | 0.629918  | -0.001649 |
| S | -1.362907 | -0.210066 | -0.086828 |
| O | 1.618006  | -0.674901 | 0.118497  |
| H | 1.826828  | -0.992871 | -0.774457 |
| H | -1.608716 | -0.325546 | 1.242112  |

### H<sub>2</sub>S<sub>2</sub>O<sub>3</sub> (Aqueous Phase)

|   |           |           |           |
|---|-----------|-----------|-----------|
| S | 0.426001  | -0.115681 | 0.072456  |
| O | 0.869668  | 0.031080  | 1.448084  |
| O | 0.961603  | 1.224255  | -0.651335 |
| O | 0.807362  | -1.282708 | -0.710456 |
| S | -1.685492 | -0.013151 | -0.061420 |
| H | -1.764359 | 1.071761  | 0.748950  |
| H | 0.807161  | 1.208529  | -1.615864 |

### **H<sub>2</sub>S<sub>2</sub>O<sub>4</sub> (Aqueous Phase)**

|   |           |           |           |
|---|-----------|-----------|-----------|
| S | -0.514586 | 1.153325  | -0.465699 |
| S | 0.514586  | -1.153325 | -0.465699 |
| O | 0.514586  | 1.694187  | 0.495299  |
| O | -1.766375 | 0.539686  | 0.349261  |
| O | 1.766375  | -0.539686 | 0.349261  |
| O | -0.514586 | -1.694187 | 0.495299  |
| H | 1.558826  | 0.389132  | 0.694700  |
| H | -1.558826 | -0.389132 | 0.694700  |

### **H<sub>2</sub>S<sub>2</sub>O<sub>6</sub> (Aqueous Phase)**

|   |           |           |           |
|---|-----------|-----------|-----------|
| S | 0.511856  | 1.012619  | -0.111741 |
| O | -0.511856 | 2.013856  | 0.110263  |
| O | 1.355720  | 0.933586  | 1.244744  |
| O | 1.379095  | 1.032815  | -1.276310 |
| H | 2.177675  | 0.407820  | 1.158282  |
| S | -0.511856 | -1.012619 | -0.111741 |
| O | 0.511856  | -2.013856 | 0.110263  |
| O | -1.355720 | -0.933586 | 1.244744  |
| O | -1.379095 | -1.032815 | -1.276310 |
| H | -2.177675 | -0.407820 | 1.158282  |

### **H<sub>2</sub>S<sub>2</sub>O<sub>7</sub> (Aqueous Phase)**

|   |           |           |           |
|---|-----------|-----------|-----------|
| S | 0.000000  | 1.482556  | 0.047367  |
| O | 0.239739  | 2.413957  | 1.112917  |
| O | -1.519228 | 1.647100  | -0.365556 |
| O | 0.857214  | 1.364641  | -1.109798 |
| H | -1.753934 | 1.159447  | -1.181889 |
| S | 0.000000  | -1.482556 | 0.047367  |
| O | -0.239739 | -2.413957 | 1.112917  |
| O | 1.519228  | -1.647100 | -0.365556 |
| O | -0.857214 | -1.364641 | -1.109798 |
| H | 1.753934  | -1.159447 | -1.181889 |
| O | 0.000000  | 0.000000  | 0.830879  |

### **HSO<sup>-</sup> (Aqueous Phase)**

|   |           |           |          |
|---|-----------|-----------|----------|
| S | 0.037279  | -0.663954 | 0.000000 |
| O | 0.037279  | 1.153036  | 0.000000 |
| H | -0.894689 | 1.398972  | 0.000000 |

### **HSO<sub>2</sub><sup>-</sup> (Aqueous Phase)**

|   |           |           |           |
|---|-----------|-----------|-----------|
| S | 0.000007  | 0.396366  | -0.122573 |
| O | 1.277572  | -0.464576 | 0.054748  |
| O | -1.277586 | -0.464567 | 0.054746  |
| H | -0.000001 | 1.091287  | 1.085214  |

### **HSO<sub>3</sub><sup>-</sup> (Aqueous Phase)**

|   |           |           |           |
|---|-----------|-----------|-----------|
| S | -0.000148 | -0.000122 | 0.194714  |
| O | 0.501514  | 1.346785  | -0.194754 |
| O | -1.417493 | -0.239269 | -0.194795 |
| O | 0.916276  | -1.107302 | -0.194873 |
| H | 0.000002  | 0.000234  | 1.559959  |

### **HSO<sub>4</sub><sup>-</sup> (Aqueous Phase)**

|   |           |           |           |
|---|-----------|-----------|-----------|
| S | 0.133021  | -0.010590 | -0.000037 |
| O | -1.500808 | 0.292452  | -0.000408 |
| O | 0.399622  | -0.782094 | -1.236035 |
| H | -1.990012 | -0.547058 | 0.000681  |
| O | 0.684359  | 1.357960  | -0.001709 |
| O | 0.399536  | -0.778755 | 1.238142  |

### **HSO<sub>5</sub><sup>-</sup> (Aqueous Phase)**

|   |           |           |           |
|---|-----------|-----------|-----------|
| S | -0.497371 | -0.062555 | -0.003376 |
| O | -0.540374 | -0.779196 | 1.283386  |
| O | -1.433608 | 1.068129  | -0.127531 |
| O | -0.398507 | -0.939801 | -1.185434 |
| O | 0.968127  | 0.839940  | 0.013431  |
| O | 2.103592  | -0.044215 | 0.123695  |
| H | 2.364096  | -0.157966 | -0.806355 |

### **HS<sub>2</sub>O<sup>-</sup> (Aqueous Phase)**

|   |           |           |           |
|---|-----------|-----------|-----------|
| S | 0.466054  | 0.642457  | 0.015704  |
| S | -1.404820 | -0.252093 | -0.004602 |
| O | 1.658160  | -0.651010 | -0.117759 |
| H | 1.754978  | -1.037744 | 0.764436  |

### **HS<sub>2</sub>O<sub>3</sub><sup>-</sup> (Aqueous Phase)**

|   |           |           |           |
|---|-----------|-----------|-----------|
| S | 0.491498  | 0.001943  | -0.000029 |
| O | 0.843243  | 1.443499  | -0.001679 |
| O | 0.888024  | -0.716436 | -1.236899 |
| O | 0.888333  | -0.713497 | 1.238454  |
| S | -1.687418 | 0.070944  | 0.000048  |
| H | -1.822083 | -1.274716 | 0.000685  |

### **HS<sub>2</sub>O<sub>4</sub><sup>-</sup> (Aqueous Phase)**

|   |           |           |           |
|---|-----------|-----------|-----------|
| S | 0.777167  | -0.070425 | 0.000617  |
| S | -1.246894 | 0.740241  | -0.009800 |
| O | -2.180678 | -0.658127 | 0.118538  |
| O | 0.910121  | -0.931967 | -1.203063 |
| O | 0.953923  | -0.821854 | 1.268763  |
| O | 1.548580  | 1.198823  | -0.069538 |
| H | -2.339926 | -1.012065 | -0.770660 |

### **HS<sub>2</sub>O<sub>6</sub><sup>-</sup> (Aqueous Phase)**

|   |           |           |           |
|---|-----------|-----------|-----------|
| S | -1.078863 | -0.148075 | -0.027900 |
| O | -1.561142 | -0.992406 | 1.066866  |
| O | -1.556544 | 1.358078  | 0.399816  |
| O | -1.540464 | -0.421763 | -1.394575 |
| H | -1.405452 | 2.001009  | -0.318497 |
| S | 1.220555  | 0.008288  | 0.004156  |
| O | 1.447922  | 1.127400  | -0.924785 |
| O | 1.495646  | 0.283459  | 1.421768  |
| O | 1.606878  | -1.325321 | -0.481789 |

### **HS<sub>2</sub>O<sub>7</sub><sup>-</sup> (Aqueous Phase)**

|   |           |           |           |
|---|-----------|-----------|-----------|
| S | -1.566859 | -0.001523 | 0.000424  |
| O | -2.345561 | 0.380595  | 1.171336  |
| O | -1.813628 | -1.327591 | -0.555949 |
| O | -1.255536 | 1.062592  | -0.965619 |
| S | 1.457348  | -0.124376 | 0.060071  |
| O | 2.508699  | -0.241673 | 1.049120  |
| O | 1.517379  | 1.399275  | -0.448114 |
| O | 1.444241  | -1.018447 | -1.087493 |
| H | 0.724445  | 1.608064  | -0.988358 |
| O | 0.072873  | -0.203963 | 0.839275  |

### **SO<sub>2</sub><sup>2-</sup> (Aqueous Phase)**

|   |          |          |           |
|---|----------|----------|-----------|
| S | 0.000000 | 0.000000 | 0.596614  |
| O | 0.000000 | 0.000000 | -1.193228 |

### **SO<sub>2</sub><sup>2-</sup> (Aqueous Phase)**

|   |          |           |           |
|---|----------|-----------|-----------|
| S | 0.000000 | 0.000000  | 0.497571  |
| O | 0.000000 | 1.325122  | -0.497571 |
| O | 0.000000 | -1.325122 | -0.497571 |



### **SO<sub>3</sub><sup>2-</sup> (Aqueous Phase)**

|   |           |           |           |
|---|-----------|-----------|-----------|
| S | 0.000768  | -0.000462 | 0.371769  |
| O | -1.105439 | -0.925895 | -0.247679 |
| O | 1.354343  | -0.493156 | -0.248350 |
| O | -0.250440 | 1.419974  | -0.247509 |

### **SO<sub>4</sub><sup>2-</sup> (Aqueous Phase)**

|   |           |           |           |
|---|-----------|-----------|-----------|
| S | -0.000349 | 0.000341  | -0.000477 |
| O | 0.409426  | -0.902252 | 1.148161  |
| O | 1.194518  | 0.238075  | -0.904368 |
| O | -0.491401 | 1.326024  | 0.548314  |
| O | -1.111846 | -0.662530 | -0.791152 |

### **SO<sub>5</sub><sup>2-</sup> (Aqueous Phase)**

|   |           |           |           |
|---|-----------|-----------|-----------|
| S | -0.398721 | 0.151744  | 0.000000  |
| O | -0.790625 | -0.572522 | 1.236918  |
| O | -0.790625 | 1.585412  | 0.000000  |
| O | -0.790625 | -0.572522 | -1.236918 |
| O | 1.245419  | 0.286216  | 0.000000  |
| O | 1.923899  | -1.030071 | 0.000000  |

### **S<sub>2</sub>O<sup>2-</sup> (Aqueous Phase)**

|   |          |           |           |
|---|----------|-----------|-----------|
| S | 0.000000 | 1.537181  | -0.181535 |
| S | 0.000000 | -1.537181 | -0.181535 |
| O | 0.000000 | 0.000000  | 0.726139  |

### **S<sub>2</sub>O<sub>3</sub><sup>2-</sup> (Aqueous Phase)**

|   |           |           |           |
|---|-----------|-----------|-----------|
| S | 0.376324  | 0.000087  | -0.000267 |
| O | 0.874135  | -0.421695 | 1.365936  |
| O | 0.877303  | 1.393365  | -0.317506 |
| O | 0.875983  | -0.972831 | -1.046853 |
| S | -1.690034 | 0.000493  | -0.000521 |

### **S<sub>2</sub>O<sub>4</sub><sup>2-</sup> (Aqueous Phase)**

|   |           |           |           |
|---|-----------|-----------|-----------|
| S | 0.354905  | 1.156614  | 0.000000  |
| S | -0.354905 | -1.156614 | 0.000000  |
| O | -0.354905 | 1.678749  | 1.267361  |
| O | -0.354905 | 1.678749  | -1.267361 |
| O | 0.354905  | -1.678749 | -1.267361 |
| O | 0.354905  | -1.678749 | 1.267361  |

**S<sub>2</sub>O<sub>6</sub><sup>2-</sup> (Aqueous Phase)**

|   |           |           |           |
|---|-----------|-----------|-----------|
| S | 0.000000  | 0.000384  | 1.126669  |
| O | 0.000000  | 1.439192  | 1.508448  |
| O | 1.246159  | -0.719060 | 1.506996  |
| O | -1.246159 | -0.719060 | 1.506996  |
| S | 0.000000  | -0.000384 | -1.126669 |
| O | 0.000000  | -1.439192 | -1.508448 |
| O | 1.246159  | 0.719060  | -1.506996 |
| O | -1.246159 | 0.719060  | -1.506996 |

**S<sub>2</sub>O<sub>7</sub><sup>2-</sup> (Aqueous Phase)**

|   |   |           |           |           |
|---|---|-----------|-----------|-----------|
| S | 0 | 0.000000  | 1.523346  | 0.004383  |
| O |   | 0.000000  | 2.391028  | 1.196334  |
| O |   | 1.238738  | 1.576758  | -0.794665 |
| O |   | -1.238738 | 1.576758  | -0.794665 |
| S |   | 0.000000  | -1.523346 | 0.004383  |
| O |   | 0.000000  | -2.391028 | 1.196334  |
| O |   | -1.238738 | -1.576758 | -0.794665 |
| O |   | 1.238738  | -1.576758 | -0.794665 |
| O |   | 0.000000  | 0.000000  | 0.768457  |
